# Supplementary material for: Crop Production and Security in Ningjin County of the North China Plain
Source: MDPI journal article supplement (doi:10.3390/foods12112196), 2023-05-30
Supplement: s1 [file s1]

# Questionnaire of farmers in Ningjin County, Dezhou City, Shandong Province, 2021

\_\_\_\_\_ (Town) \_\_\_\_\_ Villages Date: \_\_\_\_\_ Month \_\_\_\_\_ Day \_\_\_\_\_ Year Investigator: \_\_\_\_\_ Name of Respondent: \_\_\_\_\_ Tel: \_\_\_\_\_

## 1. Please fill in the basic information about the family members.

| No. | Gender | Age* | Degree of education ** | Profession                     |           |       |        |
|-----|--------|------|------------------------|--------------------------------|-----------|-------|--------|
|     |        |      |                        | ①Cultivation                   | ②Breeding | ③Wage | ④Other |
| 1   |        |      |                        | _____ day/year, _____ yuan/day |           |       |        |
| 2   |        |      |                        | _____ day/year, _____ yuan/day |           |       |        |
| 3   |        |      |                        | _____ day/year, _____ yuan/day |           |       |        |
| 4   |        |      |                        | _____ day/year, _____ yuan/day |           |       |        |
| 5   |        |      |                        | _____ day/year, _____ yuan/day |           |       |        |

\*Age(years):①<18②[18-30]③ (30-40]④(40-50]⑤(50-60]⑥>60 \*\*Degree of education: ①primary school ②middle school ③high school ④College degree or above

## 2. Please fill in the following form as required

|   | Name of crops | Cultivated area |                  |                 | Per unit yield     |                      |                 | Irrigation    |           |          |            |                          |                                    |                                   | Ground cover condition    |                             |
|---|---------------|-----------------|------------------|-----------------|--------------------|----------------------|-----------------|---------------|-----------|----------|------------|--------------------------|------------------------------------|-----------------------------------|---------------------------|-----------------------------|
|   |               | Last year (mu)  | 10 years ago(mu) | Changing reason | Last year (jin/mu) | 10 years ago(jin/mu) | Changing reason | ① Yes<br>② No | Methods * | Period** | Source *** | Distance from source (m) | Annual number of irrigation(times) | Hous of each irrigation (hr/time) | Area covered by mulch(mu) | Area of plastic shelter(mu) |
| 1 | Wheat         |                 |                  |                 |                    |                      |                 |               |           |          |            |                          |                                    |                                   |                           |                             |
| 2 | Maize         |                 |                  |                 |                    |                      |                 |               |           |          |            |                          |                                    |                                   |                           |                             |
| 3 | Cotton        |                 |                  |                 |                    |                      |                 |               |           |          |            |                          |                                    |                                   |                           |                             |
| 4 | Vegetables    |                 |                  |                 |                    |                      |                 |               |           |          |            |                          |                                    |                                   |                           |                             |
| 3 | Others        |                 |                  |                 |                    |                      |                 |               |           |          |            |                          |                                    |                                   |                           |                             |

\*Irrigation methods:①traditional irrigation(broad irrigation)②sprinkling irrigation③trickle irrigation④border irrigation⑤Other \*\*Irrigation period:①sowing②emergence③tillering④

seedling establishment⑤elongation stage⑥heading⑦anthesis \*\*\*Source of irrigation:①river②well③reservoir④industrial wastewater treatment. 1jin = 1/2 kilogram; 1 hectare = 1 mu.

3. Number of irrigation wells in your home: \_\_\_\_items
4. Is there enough irrigation water available? ☐ Yes ☐ No
5. Compared with 10 years ago, irrigation water consumption has ☐ increased ☐ decreased ☐ remained unchanged?
6. Is there any contamination of water sources (such as rivers, wells, reservoirs, etc.) in your village? ☐ None, ☐ Yes

| Pollution sources        | Changes of water source pollution in recent 10 years * | Will affect food production and income ** |
|--------------------------|--------------------------------------------------------|-------------------------------------------|
| Industrial waste         |                                                        |                                           |
| Fertilizer use           |                                                        |                                           |
| Pesticide use            |                                                        |                                           |
| Human and animal excreta |                                                        |                                           |

\*Changes of water source pollution in recent 10 years: ①increased ②decreased ③unchanged      \*\* Will affect food production and income: ①Yes ②No

7. Is the farmland contracted by your family enough at present? ☐ Yes ☐ No. Are you willing to contract more farmland?  
☐ Yes, the reason is: \_\_\_\_\_  
☐ No, the reason is: \_\_\_\_\_
8. Do you think these farmland are yours?  
☐ Yes  
☐ No. Who do you think it belongs to? A. town/village committee B. country C. don't know
9. Is the contracted farmland transferred to others?  
☐ Yes. Transfer area \_\_\_\_ mu; Transfer year \_\_\_\_; Transfer to ☐ neighbor ☐ large scale growers ☐ enterprise ☐ cooperative  
☐ No. ☐ grow it ownself ☐ leave uncultivated
10. Is the farmland currently contracted leased to others?  
☐ No. ☐ grow it ownself ☐ leave uncultivated  
☐ Yes. Do you sign formal contracts? Rent \_\_\_\_ yuan/mu/year; The lease area is \_\_\_\_ mu; The lease is for \_\_\_\_ years; Lease to ☐ neighbor ☐ large scale growers ☐ enterprise ☐ cooperative
11. Do you think there has been any change in the degree of cracking and hardening of cultivated land in recent 10 years?  
☐ aggravating ☐ unchanged ☐ mitigating  
What is the change of farmland fertility?  
☐ decreasing ☐ unchanged ☐ improving
12. Could you describe the crop straw returning to the field?

|        |                                        |
|--------|----------------------------------------|
| Choice | Amount of straw returning to the field |
|--------|----------------------------------------|

|       | Wheat | Maize | Other |
|-------|-------|-------|-------|
| 1/3   |       |       |       |
| 1/2   |       |       |       |
| All   |       |       |       |
| None* |       |       |       |

\* Use of non-returning crop straw:①for fuel②feed stocks③sell to paper mills④sell to feed mills/farmers⑤other

13. Please fill in the following table with the fertilizer usage of the major crops last year

| Type and name of fertilizer     | Wheat                      |                        |                       |           | Maize                      |                        |                      |           |
|---------------------------------|----------------------------|------------------------|-----------------------|-----------|----------------------------|------------------------|----------------------|-----------|
|                                 | Total application (jin/mu) | Frequency (times/year) | Variation of dosage * | Period ** | Total application (jin/mu) | Frequency (times/year) | Variation of dosage* | Period ** |
| <b>Organic fertilizer</b>       |                            |                        |                       |           |                            |                        |                      |           |
| 1.Cow dung                      |                            |                        |                       |           |                            |                        |                      |           |
| 2.Barnyard manure               |                            |                        |                       |           |                            |                        |                      |           |
| 3.Straw                         |                            |                        |                       |           |                            |                        |                      |           |
| 4.Fecal                         |                            |                        |                       |           |                            |                        |                      |           |
| 5.Other                         |                            |                        |                       |           |                            |                        |                      |           |
| <b>Chemical fertilizer</b>      |                            |                        |                       |           |                            |                        |                      |           |
| 1. Compound fertilizer          |                            |                        |                       |           |                            |                        |                      |           |
| 2.Diammonium phosphate          |                            |                        |                       |           |                            |                        |                      |           |
| 3.Ammonium bicarbonate          |                            |                        |                       |           |                            |                        |                      |           |
| 4.Urea                          |                            |                        |                       |           |                            |                        |                      |           |
| 5. Superphosphate               |                            |                        |                       |           |                            |                        |                      |           |
| 6. Potassium chloride           |                            |                        |                       |           |                            |                        |                      |           |
| 7.Controlled release fertilizer |                            |                        |                       |           |                            |                        |                      |           |
| 8.Other                         |                            |                        |                       |           |                            |                        |                      |           |

\* Compared with 10 years ago, the amount of fertilizer per mu changed: ①increased ②decreased ③unchanged

\*\*fertilizer applied period:①sowing②emergence③tillering④seedling establishment⑤elongation stage⑥heading⑦anthesis

14. Do you know how much fertilizer should be applied to different crops per mu?

(1) Yes. From where to know?

( ) agricultural technology extension department ( ) village head ( ) neighbor ( ) fertilizer sales company ( ) read books about ( ) instructions for packaging bag ( ) TV/ phone and other electronic devices

(2) No. How do you know how much fertilizer to use?

( ) by experience ( ) apply as much fertilizer as you buy ( ) instructions for packaging bag

15. Do you think the amount of fertilizer is appropriate? ( ) suitable ( ) too much ( ) too little

16. How do you fertilize?

( ) broadcast ( ) machine applied ( ) drilling ( ) hole fertilization ( ) trickle irrigation ( ) spray ( ) other

17. Do you think the more fertilizer you apply, the higher the yield? ( ) Yes ( ) No

18. Do you think too much fertilizer will pollute the farmland or groundwater? ( ) Yes ( ) No

19. Please describe the occurrence of major diseases and the use of pesticides last year

| Crops  | Major diseases             | Pesticides<br>* | Dosage of<br>pesticides(jin/mu) | Frequency(times/year) | Change<br>of<br>dosage** | Is the dosage<br>appropriate?*** |
|--------|----------------------------|-----------------|---------------------------------|-----------------------|--------------------------|----------------------------------|
| Wheat  | 1.stripe rust              |                 |                                 |                       |                          |                                  |
|        | 2.head scab                |                 |                                 |                       |                          |                                  |
|        | 3.sharp eyespot            |                 |                                 |                       |                          |                                  |
|        | 4.aphid                    |                 |                                 |                       |                          |                                  |
| Maize  | 5.powdery<br>mildew        |                 |                                 |                       |                          |                                  |
|        | 1.spodoptera<br>frugiperda |                 |                                 |                       |                          |                                  |
|        | 2.armyworm                 |                 |                                 |                       |                          |                                  |
|        | 3.borer                    |                 |                                 |                       |                          |                                  |
|        | 4.leaf blight              |                 |                                 |                       |                          |                                  |
|        | 5.smut                     |                 |                                 |                       |                          |                                  |
| Others | 6.sharp eyespot            |                 |                                 |                       |                          |                                  |
|        |                            |                 |                                 |                       |                          |                                  |

\* Name of pesticides:①pyrethroid②carbendazim③imidacloprid④acaricide⑤omethoate⑥acetaniprid⑦lesiben⑧triadimefon  
⑨propiconazole⑩lipoic acid

\*\* Compared with 10 years ago, the amount of pesticides per mu changed: ①increased ②decreased ③unchanged \*\*\* Is the dosage appropriate? ①suitable ②too much ③too little

20. Do you know the standard amount of pesticides for different crop diseases?

(1) Yes.。 From where to know?

( ) agricultural technology extension department ( ) village head ( ) neighbor ( ) pesticides sales company ( ) read books about ( ) instructions for packaging bag ( ) TV/ phone and other electronic devices

- (2) No. How do you know how much pesticides to use?  
☐ by experience    ☐ apply as much fertilizer as you buy    ☐ instructions for packaging bag
21. Do you think the more pesticides you use, the less pests you have? ☐ Yes    ☐ No
22. Do you think the use of pesticides will cause pollution to farmland or water? ☐ Yes ☐ No
23. Please describe your usual method of dosing  
☐ spray    ☐ seed dressing    ☐ mix with manure    ☐ mix with irrigation water  
☐ aerosol    ☐ dusting    ☐ dip the seed    ☐ coating    ☐ other
24. Do you use protection when using pesticides? ☐ Yes, there is \_\_\_\_\_ ☐ No, why?
25. Does anyone in your family have health problems due to the use of chemical fertilizers or pesticides?  
 (1) None.  
 (2) Yes, for example, \_\_\_\_\_. Has the phenomenon increased or decreased over the past decade?
26. Please fill in the production cost of main crops in your cultivated land last year in the following table (yuan).

| Items                                  | Wheat | Maize | Others | Total |
|----------------------------------------|-------|-------|--------|-------|
| seeds                                  |       |       |        |       |
| organic fertilizers                    |       |       |        |       |
| chemical fertilizers                   |       |       |        |       |
| pesticides                             |       |       |        |       |
| hire farm machinery/livestock          |       |       |        |       |
| transportation *                       |       |       |        |       |
| cost of building plastic shelter/mulch |       |       |        |       |
| labor input **                         |       |       |        |       |
| others                                 |       |       |        |       |

\* transportation costs include the cost of moving products, selling products, etc., such as selling trees

\*\* The number of people employed, the number of days employed (\_\_\_ days/year), the wage (\_\_\_ yuan/day) and the total expenses of the employer

27. Fill in the following table itemized and detailed your income from arable land last year

| Source of income | Income                 | Source of income  | Income(yuan) |
|------------------|------------------------|-------------------|--------------|
| sale of wheat    | quantity sold: _____ t | Non-farm income   |              |
|                  | income: _____ yuan     | -food subsidies   |              |
| sale of maize    | quantity sold: _____ t | - other subsidies |              |
|                  | income: _____ yuan     | Others            |              |
| Total:           |                        |                   |              |

28. Have you ever received the services of an agricultural extension worker? If so, fill out the form below

| Services received | Times of services | Services organizations(play check √ ) |            |              |                       |                |        |
|-------------------|-------------------|---------------------------------------|------------|--------------|-----------------------|----------------|--------|
|                   |                   | Village-level                         | Town-level | County-level | Peasants' cooperative | Town extension | Others |
| 1.                |                   |                                       |            |              |                       |                |        |
| 2.                |                   |                                       |            |              |                       |                |        |
| 3.                |                   |                                       |            |              |                       |                |        |
